# Supplementary material for: Collective variable discovery in the age of machine learning: reality, hype and everything in between
Source: Royal Society of Chemistry journal article supplement (doi:10.1039/d2ra03660f), 2022-01-01
Supplement: d2ra03660f1.pdf [file d2ra03660f1.pdf]

## Supplementary Informations

August 22, 2022

Table 1. Torsional features and corresponding feature indexes used in TICA (Figure 7) and train classifier algorithms (Figure 14)

| featureindex | atominds             | featuregroup | featurizer | otherinfo | resids | resnames |
|--------------|----------------------|--------------|------------|-----------|--------|----------|
| 0            | [15, 17, 19, 22]     | chi1         | Dihedral   | sin       | [75]   | [GLU]    |
| 1            | [30, 32, 34, 37]     | chi1         | Dihedral   | sin       | [76]   | [MET]    |
| 2            | [47, 49, 51, 54]     | chi1         | Dihedral   | sin       | [77]   | [ASN]    |
| 3            | [61, 63, 65, 68]     | chi1         | Dihedral   | sin       | [78]   | [TYR]    |
| 4            | [82, 84, 86, 88]     | chi1         | Dihedral   | sin       | [79]   | [VAL]    |
| 5            | [98, 100, 102, 105]  | chi1         | Dihedral   | sin       | [80]   | [SER]    |
| 6            | [116, 118, 120, 126] | chi1         | Dihedral   | sin       | [82]   | [THR]    |
| 7            | [130, 132, 134, 136] | chi1         | Dihedral   | sin       | [83]   | [VAL]    |
| 8            | [146, 148, 150, 153] | chi1         | Dihedral   | sin       | [84]   | [SER]    |
| 9            | [15, 17, 19, 22]     | chi1         | Dihedral   | cos       | [75]   | [GLU]    |
| 10           | [30, 32, 34, 37]     | chi1         | Dihedral   | cos       | [76]   | [MET]    |
| 11           | [47, 49, 51, 54]     | chi1         | Dihedral   | cos       | [77]   | [ASN]    |
| 12           | [61, 63, 65, 68]     | chi1         | Dihedral   | cos       | [78]   | [TYR]    |
| 13           | [82, 84, 86, 88]     | chi1         | Dihedral   | cos       | [79]   | [VAL]    |
| 14           | [98, 100, 102, 105]  | chi1         | Dihedral   | cos       | [80]   | [SER]    |
| 15           | [116, 118, 120, 126] | chi1         | Dihedral   | cos       | [82]   | [THR]    |
| 16           | [130, 132, 134, 136] | chi1         | Dihedral   | cos       | [83]   | [VAL]    |
| 17           | [146, 148, 150, 153] | chi1         | Dihedral   | cos       | [84]   | [SER]    |
| 18           | [17, 19, 22, 25]     | chi2         | Dihedral   | sin       | [75]   | [GLU]    |
| 19           | [32, 34, 37, 40]     | chi2         | Dihedral   | sin       | [76]   | [MET]    |
| 20           | [49, 51, 54, 55]     | chi2         | Dihedral   | sin       | [77]   | [ASN]    |
| 21           | [63, 65, 68, 69]     | chi2         | Dihedral   | sin       | [78]   | [TYR]    |
| 22           | [17, 19, 22, 25]     | chi2         | Dihedral   | cos       | [75]   | [GLU]    |
| 23           | [32, 34, 37, 40]     | chi2         | Dihedral   | cos       | [76]   | [MET]    |
| 24           | [49, 51, 54, 55]     | chi2         | Dihedral   | cos       | [77]   | [ASN]    |
| 25           | [63, 65, 68, 69]     | chi2         | Dihedral   | cos       | [78]   | [TYR]    |
